# Supplementary material for: Protein–protein interaction as a powering source of oxidoreductive reactivity
Source: Royal Society of Chemistry journal article supplement (doi:10.1039/b927132e), 2010-05-17
Supplement: b927132e.pdf [file b927132e.pdf]

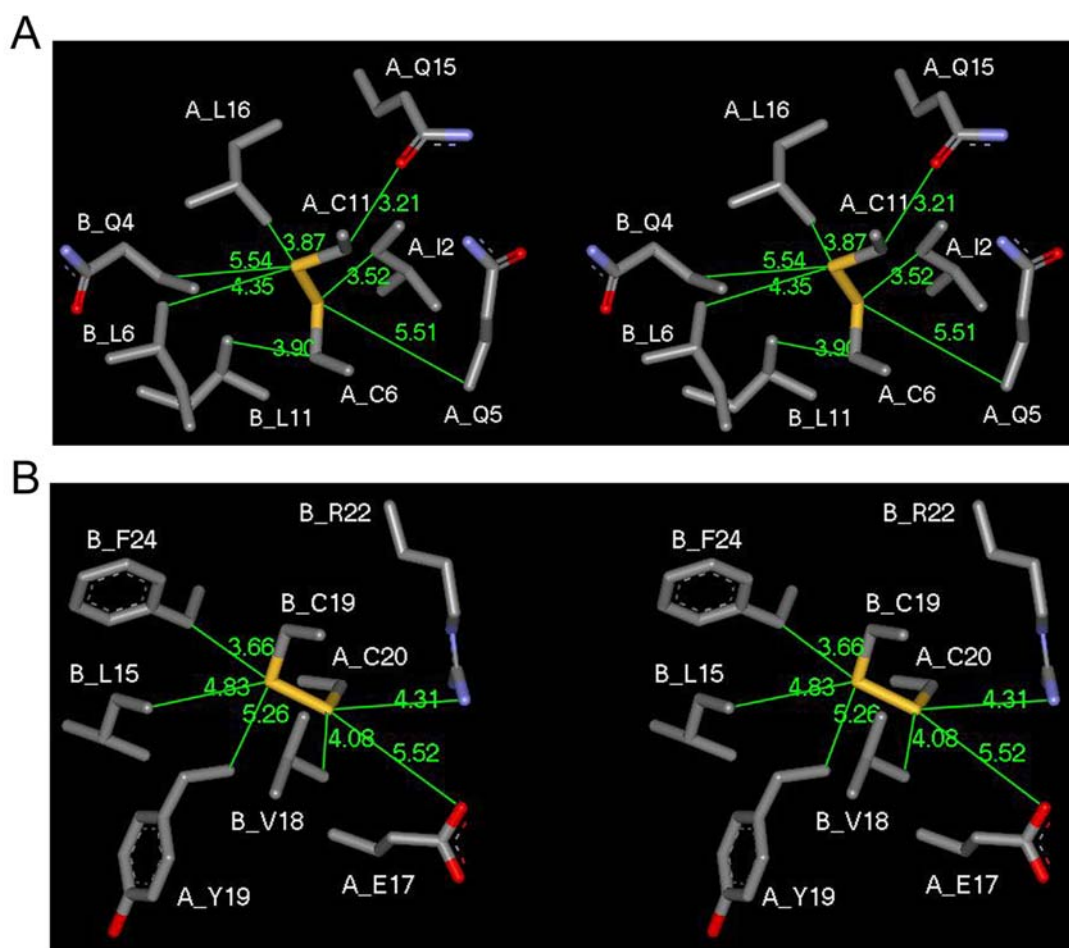

```

H. sapiens|a' DKQPVKVLVGKNFEDVAFDEKKNVFVEFYAPWCGHCKQLAPIWDKLGETYKDHEN-IVIA 59
B. taurus |a' DKQPVKVLVGKNFEEVAFDEKKNVFVEFYAPWCGHCKQLAPIWDKLGETYKDHEN-IVIA 59
H. sapiens|a EEEDHVLVLKSNFAEALAAHKYLLVEFYAPWCGHCKALAPEYAKAAGKLKAEGSEIRLA 60
B. taurus |a DEEDHVLVLHKGNFDEALAAHKYLLVEFYAPWCGHCKALAPEYAKAAGKLKAEGSEIRLA 60
          :::   ::: *.      *:  :* ::***** *** : * . . * . . * :*

H. sapiens|a' KMDST--ANEVEAVKVHSFPTLKFFPASADRTVIDYNGERTLDGFKKFLESGGQ 111
B. taurus |a' KMDST--ANEVEAVKVHSFPTLKFFPASADRTVIDYNGERTLDGFKKFLESGGQ 111
H. sapiens|a KVDATEESDLAQYGVRGYPTIKFFRNGDTASPKYTAGREADDIVNWLKKRTG 114
B. taurus |a KVDATEESDLAQYGVRGYPTIKFFRNGDTASPKYTAGREADDIVNWLKKRTG 114
          *:.*:  ::  :  *:.:**:*  .  :  :*.. *  *:  ::*:.

```

Figure S2. Alignment of bovine and human PDI  $\alpha$ - and  $\alpha'$ - domain sequences. The amino acid differences between human and bovine are colored in pink for  $\alpha$ - domains and blue for  $\alpha'$ - domains. The CXXC motif is shown in green.
